# Supplementary material for: From liquid to thin film: colloidal suspensions for tungsten oxide as an electrode material for Li-ion batteries
Source: Royal Society of Chemistry journal article supplement (doi:10.1039/c6ra08769h), 2016-01-01
Supplement: c6ra08769h1.pdf [file c6ra08769h1.pdf]

## Supporting information

### From liquid to thin film: colloidal suspensions for tungsten oxide as an electrode material for Li-ion batteries

E.J. van den Ham<sup>a</sup>, K. Elen<sup>a</sup>, I. Kokal<sup>b</sup>, B. Yağcı<sup>c</sup>, N. Peys<sup>a</sup>, G. Bonneux<sup>a</sup>, F. Ulu<sup>a</sup>, W. Marchal<sup>a</sup>, M.K. Van Bael<sup>a</sup> and A. Hardy<sup>a</sup>

<sup>a</sup> Hasselt University, Institute for Materials Research; Inorganic and Physical Chemistry and imec, division imomec. Martelarenlaan 42, 3500 Hasselt, Belgium.

<sup>b</sup> Pavezyum Chemicals, Orhanlı Mah. Ulu Sokak No:3, 34956 Tuzla, Istanbul, Turkey.

<sup>c</sup> Koç University Surface Science and Technology Center (KUYTAM). Rumelifeneri Yolu, 34450, Sarıyer, Istanbul, Turkey

**Video S1.** Video footage of the synthesis performed.  $\text{WCl}_6$  was dissolved in Ethanol. After complete dissolution, water was added, shifting the color from yellow to colorless and finally dark blue.

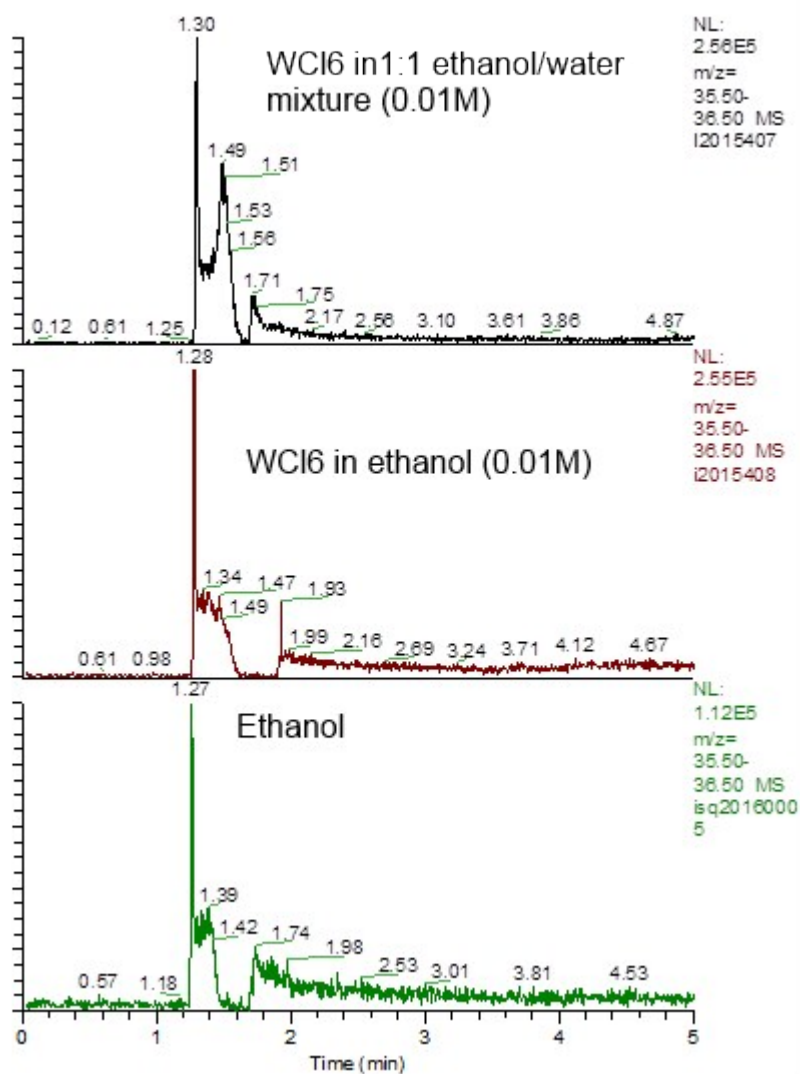

**Figure S1.** MS data of headspace GCMS measurements performed on the precursors and ethanol, showing the 35.5-36.5 u fraction (HCl).

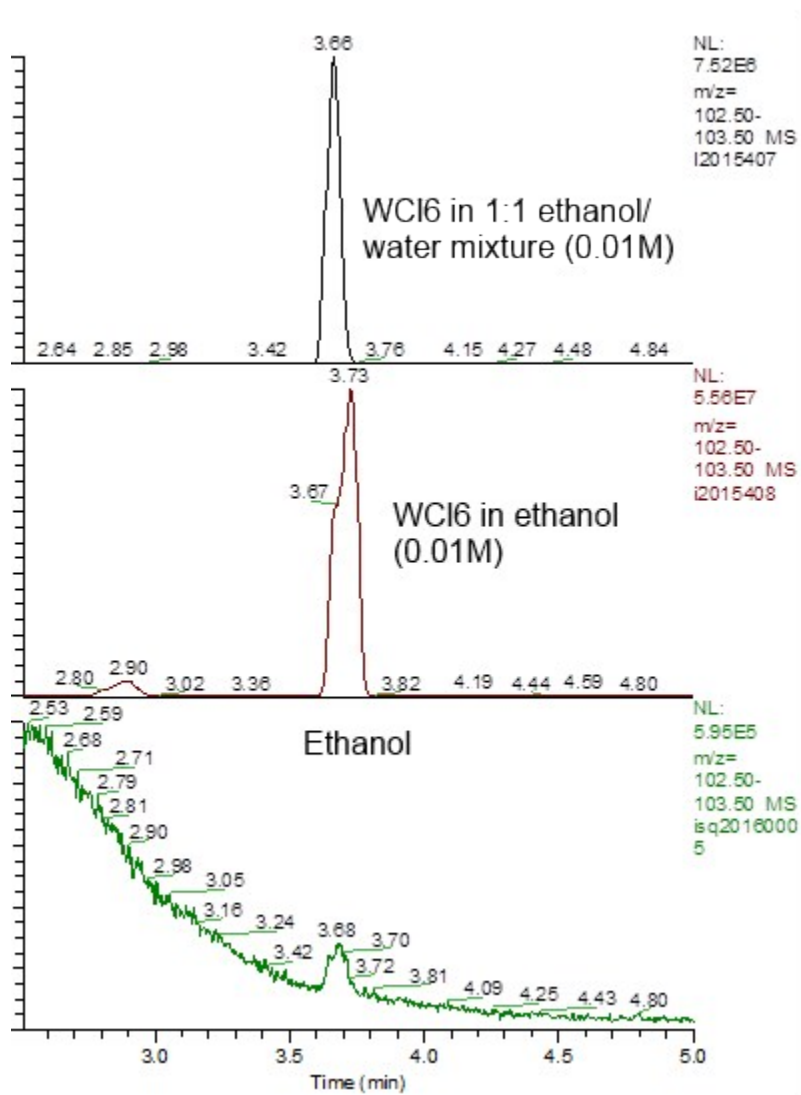

**Figure S2.** MS data of headspace GCMS measurements performed on the precursors and ethanol, showing the 102.5-103.5 u fraction (DEE).

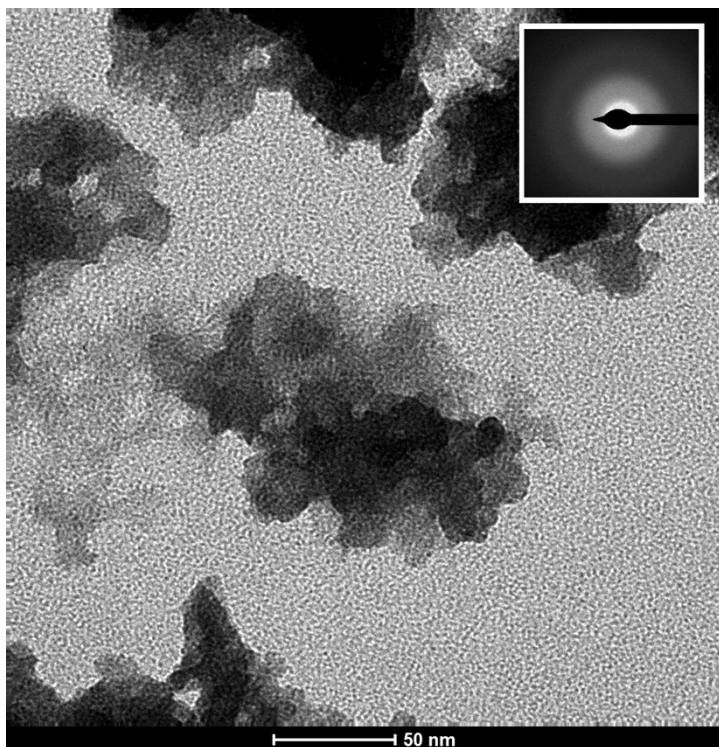

**Figure S3.** TEM image of the tungsten precursor deposited on a copper grid and dried before measuring. The inset shows electron diffraction (ED) of a cluster of circular particles.

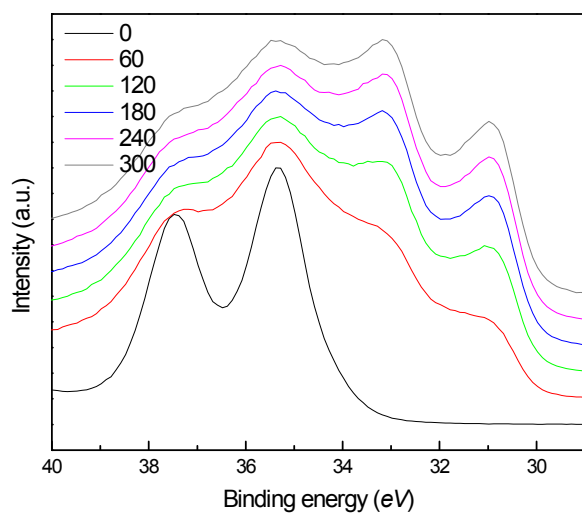

**Figure S4.** W4f XPS spectrum of WO<sub>3</sub> films annealed at 500°C for 1 hour (static air) on TiN. Etching times are indicates in seconds (s).

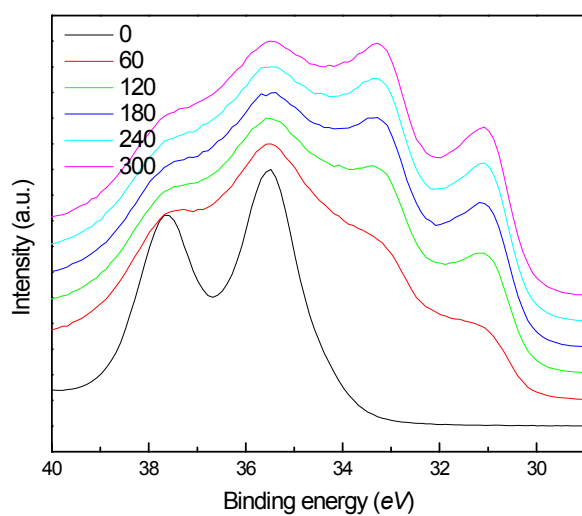

**Figure S5.** W4f XPS spectrum of WO<sub>3</sub> films annealed at 500°C for 1 hour (static air) on Pt. Etching times are indicates in seconds (s).

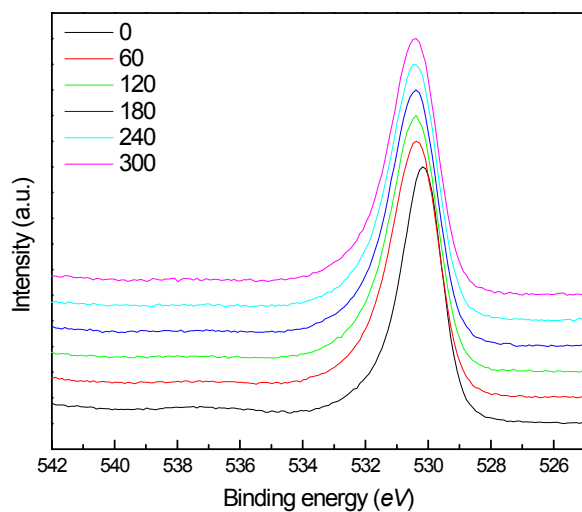

**Figure S6.** O1s XPS spectrum of WO<sub>3</sub> films annealed at 500°C for 1 hour (static air) on TiN. Etching times are indicates in seconds (s).

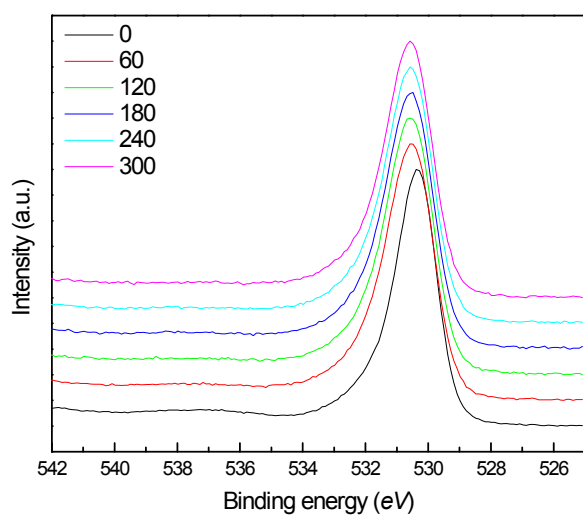

**Figure S7.** O1s XPS spectrum of  $\text{WO}_3$  films annealed at  $500^\circ\text{C}$  for 1 hour (static air) on Pt. Etching times are indicates in seconds (s).

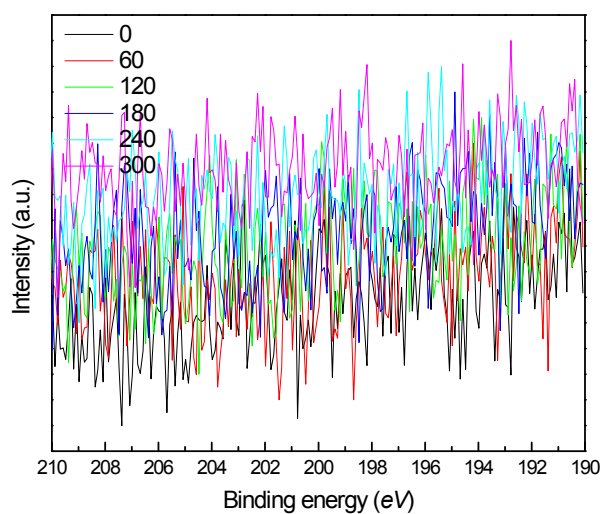

**Figure S8.** Cl2p XPS spectrum of  $\text{WO}_3$  films annealed at  $500^\circ\text{C}$  for 1 hour (static air) on TiN. Etching times are indicates in seconds (s).

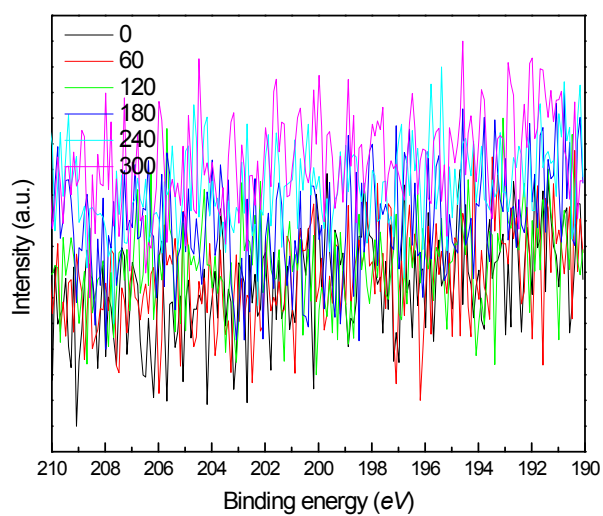

**Figure S9.** Cl<sub>2</sub>p XPS spectrum of WO<sub>3</sub> films annealed at 500°C for 1 hour (static air) on Pt. Etching times are indicates in seconds (s).

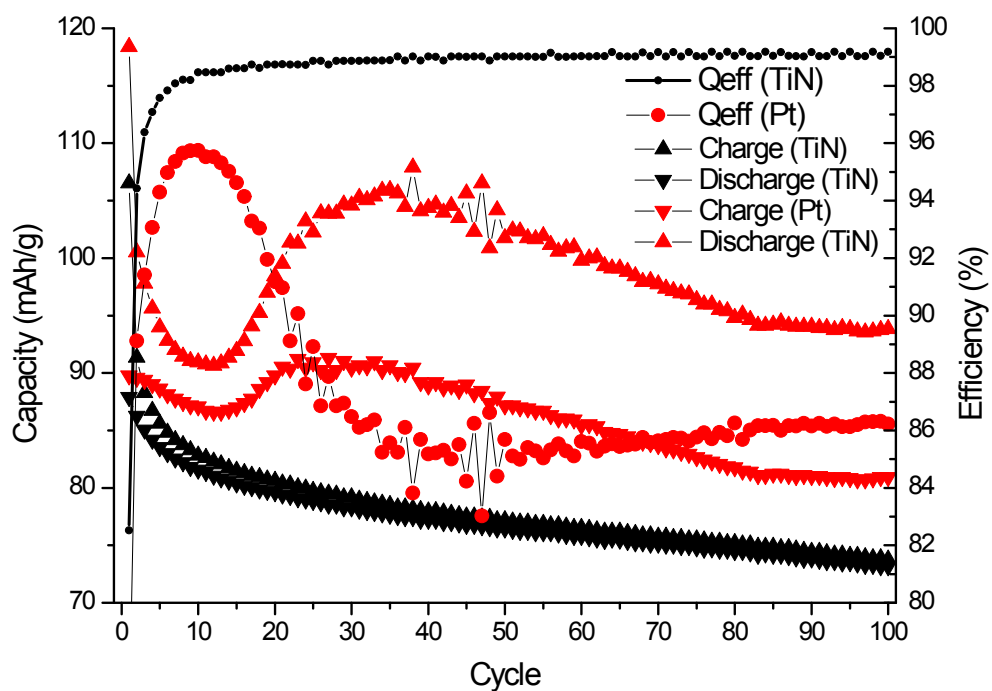

**Figure S10.** Charge/discharge measurements of 10 layers of WO<sub>3</sub> deposited on TiN (black) and Pt (red), measured at 1 mV·s<sup>-1</sup> in 1.0 m LiClO<sub>4</sub> in PC. The films were submitted to a post deposition anneal of 1 hour at 400°C in static air.
